# Supplementary material for: Direct synthesis of size-tailored bimetallic Ag/Au nano-spheres and nano-chains with controllable compositions by laser ablation of silver plate in HAuCl4 solution
Source: Royal Society of Chemistry journal article supplement (doi:10.1039/c5ra24578h), 2016-01-01
Supplement: c5ra24578h1.pdf [file c5ra24578h1.pdf]

Supplementary Information

**Direct synthesis of size-tailored bimetallic Ag/Au nano-spheres and nano-chains with controllable compositions by laser ablation of silver plate in  $\text{HAuCl}_4$  solution**

Ming Chen\*, DaMeng Wang, and XiangDong Liu

*School of Physics, Shandong University, Jinan250100, China*

[\\*chenming@sdu.edu.cn](mailto:chenming@sdu.edu.cn)

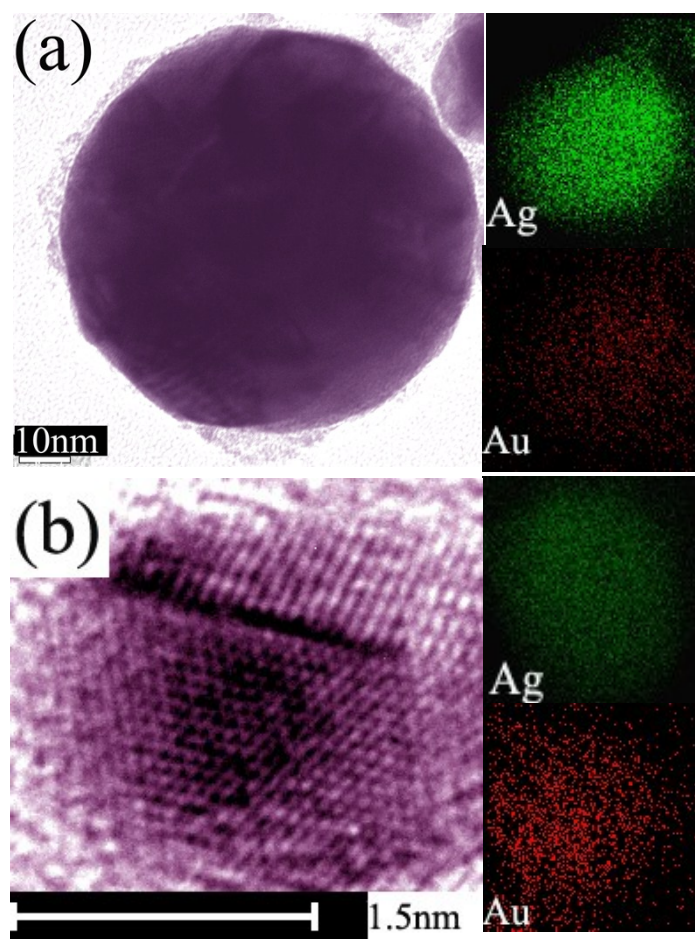

Figure.S1 (a) (b) The single bimetallic Ag/Au nano-spheres fabricated by laser ablation of the pure Ag plate in an activated

liquid containing 0.12 and 4.59 mM H<sub>AuCl</sub>4 respectively . And the corresponding elemental mapping images of Ag and Au, respectively.

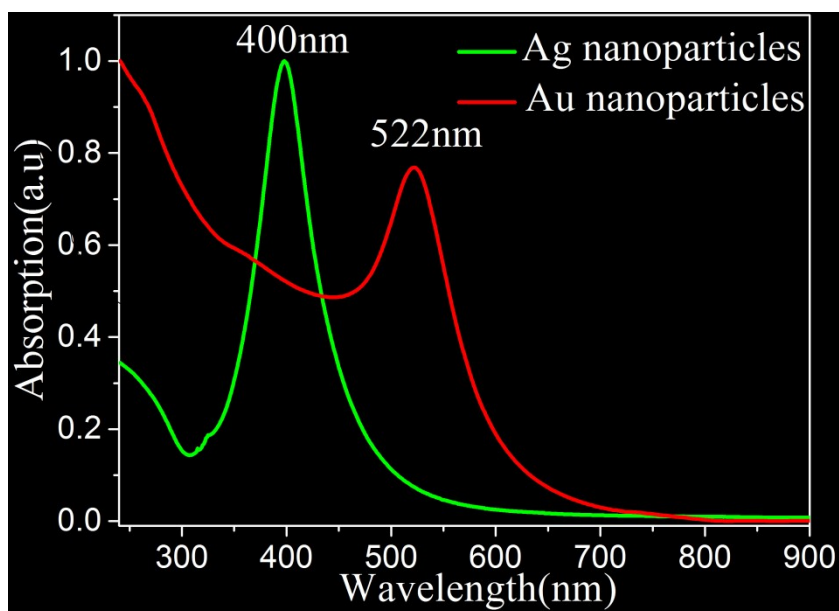

Figure.S2 UV-visible absorption spectra of the pure Ag and Au nano-particles by laser ablation of Ag and Au target in liquid, respectively.
